# Supplementary material
Source: PubMed Central journal article supplement (PMC2563962)
Supplement: NIHMS60214-supplement-01.pdf [file NIHMS60214-supplement-01.pdf]

## Supplemental Data

## Starch Catabolism by a Prominent Human Gut Symbiont Is Directed by the Recognition of Amylose Helices

Nicole M. Koropatkin, Eric C. Martens, Jeffrey I. Gordon, and Thomas J. Smith

Table S1. Bacterial Strains and Plasmids

| <u>Bacterial strains</u>                             | <u>Features/use</u>                                                                                                                  | <u>Source or reference</u>   |
|------------------------------------------------------|--------------------------------------------------------------------------------------------------------------------------------------|------------------------------|
| <i>B. thetaiotaomicron</i> ATCC 29148                | wild-type parent strain; FUDR <sup>S</sup>                                                                                           | Jeffrey I. Gordon Laboratory |
| <i>B. thetaiotaomicron</i> $\Delta tdk$              | ATCC 29148 with <i>tdk</i> deletion; FUDR <sup>R</sup>                                                                               | This work                    |
| <i>B. thetaiotaomicron</i> $\Delta susD$             | Derivative of $\Delta tdk$ strain with <i>susD</i> deletion                                                                          | This work                    |
| <i>B. thetaiotaomicron</i> $\Delta susD::PsusB-susD$ | $\Delta susD$ strain with complementing <i>susD</i> allele                                                                           | This work                    |
| <u>Plasmids</u>                                      | <u>Features/use</u>                                                                                                                  | <u>Source or reference</u>   |
| pGERM                                                | Source of <i>bla-ermG</i> fragment                                                                                                   | (Shipman et al., 1999)       |
| pEPJ::N2                                             | source of <i>att-intN2</i> from <i>NBU2</i>                                                                                          | Abigail Salyers              |
| pKNOCK-cm                                            | <i>ori</i> R6K suicide vector; Cm <sup>R</sup>                                                                                       | (Alexeyev, 1999)             |
| pKNOCK- <i>bla-ermGb</i>                             | Derivative of pKNOCK-Cm, Erm <sup>R</sup> , Amp <sup>R</sup>                                                                         | This study                   |
| pExchange- <i>tdk</i>                                | Derivative of pKNOCK- <i>bla-ermGb</i> carrying cloned <i>tdk</i>                                                                    | This study                   |
| p <i>NBU2-bla-ermGb</i>                              | Derivative of pKNOCK- <i>bla-ermGb</i> , inserts into <i>NBU2 att1</i> and/or <i>att2</i> sites, Erm <sup>R</sup> , Amp <sup>R</sup> | This study                   |

Table S2. Primers

| <u>Primers:</u>                               | <u>Sequence (5'-3')</u>                                       | <u>Use</u>                                   |
|-----------------------------------------------|---------------------------------------------------------------|----------------------------------------------|
| <i>susD</i> fwd ( <i>NheI</i> )               | ctagctagcatcaacgatctggatattagtc                               | <i>susD</i> cloning/over-expression          |
| <i>susD</i> rev ( <i>XhoI</i> )               | ccgctcgcgattattatagccttcattttgtg                              | <i>susD</i> cloning/over-expression          |
| <i>bla-ermG</i> fwd ( <i>MluI</i> )           | gcgacgcggttatgagtaaaccttggtctgacag                            | pKNOCK- <i>bla-ermG</i> construction         |
| <i>bla-ermG</i> rev ( <i>MluI</i> )           | gcgacgcgtaaacatttacagttgcatgtggc                              | pKNOCK- <i>bla-ermG</i> construction         |
| <i>intN2-att</i> fwd ( <i>KpnI</i> )          | gcggttaccaacaataactttcaggacgatgta                             | pNBU2- <i>ermG</i> construction              |
| <i>intN2-att</i> rev ( <i>SalI</i> )          | gcggtcgcactaatgcctattctccagtgatg                              | pNBU2- <i>ermG</i> construction              |
| <i>Δtdk</i> upstream fwd ( <i>KpnI</i> )      | gcggtaccgaaaccattgtagagataccg                                 | <i>tdk</i> (BT2275) deletion                 |
| <i>Δtdk</i> upstream rev ( <i>SalI</i> )      | gcggtcgcactaccatgtgattttgtccttc                               | <i>tdk</i> (BT2275) deletion                 |
| <i>Δtdk</i> downstream fwd ( <i>SalI</i> )    | gcggtcgcagcagcagacagaagatataaaac                              | <i>tdk</i> (BT2275) deletion                 |
| <i>Δtdk</i> downstream rev ( <i>SpeI</i> )    | gcgactagttcgccggacatttcggaagg                                 | <i>tdk</i> (BT2275) deletion                 |
| <i>tdk</i> fwd ( <i>KpnI</i> )                | gcggtaccgcttctccacaacagtctgc                                  | <i>tdk</i> cloning for pExchange- <i>tdk</i> |
| <i>tdk</i> fwd ( <i>SalI</i> )                | gcggtcgcactcgaatgtattcttcttcttc                               | <i>tdk</i> cloning for pExchange- <i>tdk</i> |
| <i>ΔsusD</i> upstream fwd ( <i>SalI</i> )     | gcggtcgcagtcatacacaactcaagtc                                  | <i>susD</i> (BT3701) deletion                |
| <i>ΔsusD</i> upstream rev                     | catgataaattgatttaagaatgtag                                    | <i>susD</i> (BT3701) deletion                |
| <i>ΔsusD</i> downstream fwd                   | ctaacattcattaatacaatttatcatgtaaccaagagttc<br>atccttataataaaag | <i>susD</i> (BT3701) deletion                |
| <i>ΔsusD</i> downstream rev ( <i>XbaI</i> )   | gcgctagatccgcacatctccagtatctgc                                | <i>susD</i> (BT3701) deletion                |
| <i>P<sub>susB</sub></i> fwd ( <i>SalI</i> )   | gcggtcgcacataagttcacttcaacttatattatcag                        | <i>susD</i> complementation                  |
| <i>P<sub>susB</sub></i> rev ( <i>EcoR V</i> ) | gcggatatccattctattatggtattaaattataagc                         | <i>susD</i> complementation                  |
| <i>susD</i> complement fwd ( <i>EcoR V</i> )  | gcggatatccttcttattaggtttaagtctgc                              | <i>susD</i> complementation                  |
| <i>susD</i> complement rev ( <i>SpeI</i> )    | gcgactagtttattatagccttcattttgtgacat                           | <i>susD</i> complementation                  |
| NBU2 <i>att1</i> fwd                          | cctttgcaccgcttcaacg                                           | flanks tRNA <sup>ser</sup> NBU2 <i>att1</i>  |
| NBU2 <i>att1</i> rev                          | tcaactaaacatgagatactagc                                       | flanks tRNA <sup>ser</sup> NBU2 <i>att1</i>  |
| NBU2 <i>att2</i> fwd                          | tatcctattcttagagcgcac                                         | flanks tRNA <sup>ser</sup> NBU2 <i>att2</i>  |
| NBU2 <i>att2</i> rev                          | ggtgtactctgacattgaagg                                         | flanks tRNA <sup>ser</sup> NBU2 <i>att2</i>  |
| <i>susA</i> qRT-PCR fwd                       | tcggcagtagaaggtttga                                           | <i>susA</i> transcript quantification        |
| <i>susA</i> qRT-PCR rev                       | actccgaggtctgctatgtaac                                        | <i>susA</i> transcript quantification        |
| <i>susB</i> qRT-PCR fwd                       | gcccgaatatcctcgcctca                                          | <i>susB</i> transcript quantification        |
| <i>susB</i> qRT-PCR rev                       | cgctggtcagtcgctggtgtaa                                        | <i>susB</i> transcript quantification        |
| <i>susC</i> qRT-PCR fwd                       | gctattggcgggacattgg                                           | <i>susC</i> transcript quantification        |
| <i>susC</i> qRT-PCR rev                       | cagcggattttgggagagattcg                                       | <i>susC</i> transcript quantification        |
| <i>susD</i> qRT-PCR fwd                       | gtatcgacggctcctcgacctc                                        | <i>susD</i> transcript quantification        |
| <i>susD</i> qRT-PCR rev                       | cccaaacggagcgtaaaccactct                                      | <i>susD</i> transcript quantification        |
| <i>susE</i> qRT-PCR fwd                       | gtttccggcagctaccacctac                                        | <i>susE</i> transcript quantification        |
| <i>susE</i> qRT-PCR rev                       | aagtcgagaagegcattgttgagt                                      | <i>susE</i> transcript quantification        |
| <i>susF</i> qRT-PCR fwd                       | ggctgttgatcccgcagctattat                                      | <i>susF</i> transcript quantification        |
| <i>susF</i> qRT-PCR rev                       | aaggctttggcagctatgctgtt                                       | <i>susF</i> transcript quantification        |
| <i>susG</i> qRT-PCR fwd                       | ccgccgacatcctacatctatta                                       | <i>susG</i> transcript quantification        |
| <i>susG</i> qRT-PCR rev                       | gtccgctaccggtttacatttttc                                      | <i>susG</i> transcript quantification        |
| 16s qRT-PCR fwd                               | ggtagtccacacagtaaacgatgaa                                     | 16s transcript quantification                |
| 16s qRT-PCR rev                               | cccgtcaattcctttgagtttc                                        | 16s transcript quantification                |

**Figure S1.** qRT-PCR of *sus* Genes

Wild-type,  $\Delta susD$  and  $\Delta susD::P_{susB}-susD$  *B. thetaiotaomicron* strains were grown to mid-log phase on either glucose or maltose as a sole carbon source. Fold-induction of individual genes in the *susABCDEFG* cluster are expressed as the ratio of expression on maltose divided by expression on glucose. In the  $\Delta susD$  mutant only the *susD* transcript is missing, indicating that the in-frame deletion of this gene does not influence expression of other *sus* genes. Note that despite being controlled by the maltose-inducible  $P_{susB}$  promoter, a single-copy of *susD* placed in the genome at one of the two *att NBU2* insertion sites provides ~10% of wild-type *susD* expression. Reduced *susD* expression in the complemented strain is the likely reason for partial recovery of the *susD* dependent growth phenotypes shown in Figure. 2.

**Figures S2-S5.** These Figures Show the Raw Data and Attempts at Using Origin for Fitting to the Data for Maltoheptaose,  $\alpha$ -Cyclodextrin (G6),  $\beta$ -Cyclodextrin (G7), and  $\gamma$ -Cyclodextrin (G8), Respectively

The low affinity of the ligands made for unstable refinement of the various binding parameters and therefore a stepwise binding analysis was performed as described in the Methods section.

**Figure S6.** Native and SDS PAGE Analysis of SusD Showing a Possible Oligomeric Assembly in Solution

On the right side of this figure is an SDS-PAGE gel demonstrating that the cloned and purified SusD sample is extremely homogeneous. On the left side of this figure is a native gel of the same sample of SusD showing a series of higher molecular weight bands consistent with oligomerization of SusD in solution.

## Supplemental Experimental Procedures

### *B. thetaiotaomicron* Growth and Culture Conditions

Bacterial strains, plasmids and primers are summarized in Tables S3 and S4. *B. thetaiotaomicron* was routinely grown in TYG medium (Holdeman et al., 1977) or on brain-heart infusion (BHI; Beckton dickinson, co.) agar supplemented with 10% horse blood and stored at -80°C in TYG supplemented with 25% glycerol. Antibiotics (Sigma) were added as appropriate: erythromycin (25 µg ml<sup>-1</sup>), gentamycin (200 µg ml<sup>-1</sup>) and 5-fluor-2'-deoxyuridine (FUdR, 200 µg ml<sup>-1</sup>). *E. coli* S17-1 λ *pir* (Simon et al., 1983) was used for conjugation of constructs into *B. thetaiotaomicron*.

### Quantitative Real-Time PCR

Quantification of *susABCDEFG* transcripts was conducted by quantitative real-time PCR (qRT-PCR) using total cellular RNA extracted from the glucose- and maltose-grown cultures of Figure 2 (n=3 per strain and growth condition). Bacteria were harvested during logarithmic growth between OD<sub>600</sub> values of 0.5-0.57 and preserved in RNAProtect (Qiagen) according to the manufacturer's instructions. RNA was extracted using an RNAeasy purification kit (Qiagen) and 2 µg of RNA from each sample was reverse-transcribed into cDNA using Superscript II reverse transcriptase (Invitrogen). qRT-PCR was conducted on a Stratagene model MX3000P instrument. PCR conditions were 40 cycles of 15 sec at 95°C, 45 sec at 55°C, 30 sec at 72°C. The 25 µL PCR reactions contained 12.5 µL Absolute™ QPCR SYBR® Green ROX (ABgene House, Epsom, UK), 0.25 µL UDP-N-glycosidase (1 unit/µL; Invitrogen), 10 ng of cDNA and gene-specific primers (0.3 µM each). Individual samples were normalized by 16s rDNA quantification.

## New *Bacteroides* spp. Plasmid Constructs

Three new plasmid constructs were created during this work (Table S3) that are derivatives of the *oriR6K* suicide vector pKNOCK-Cm (Alexeyev, 1999). Plasmid pKNOCK-*bla-ermGb* was constructed by removing an *MluI* fragment carrying the *cat* (chloramphenicol resistance) gene from pKNOCK-Cm and replacing it with an *MluI* ended *bla-ermG* fragment (containing  $\beta$ -lactamase for ampicillin selection in *E. coli* and *ermG* for erythromycin selection in *Bacteroides* spp.) that was amplified from the *Bacteroides* spp. suicide vector pGERM (Shipman et al., 1999).

Two additional plasmids were constructed by elaborating upon pKNOCK-*bla-ermGb*. The counter-selectable suicide vector for *B. thetaiotaomicron* allelic exchange, pExchange-*tdk*, was constructed by amplifying *BT2275* (promoter and ORF) and ligating it into the *KpnI* and *SalI* sites of pKNOCK-*bla-ermGb*. The NBU2-based genomic insertion vector, pNBU2-*bla-ermGb*, was constructed by amplifying a fragment containing the integrase (*intN2*) and attachment site (*attN2*) from the non-replicating *Bacteroides* element NBU2 using plasmid pEPJ::N2 (a kind gift from Abigail Salyers, University of Illinois, Urbana-Champaign) as a template and ligating it into the *KpnI* and *SalI* sites of pKNOCK-*bla-ermGb*. The pNBU2-*bla-ermGb* carries cloned DNA fragments into the *B. thetaiotomicron* genome in single-copy by integrating into one of two tRNA<sup>ser</sup> attachment sites.

## Supplemental References

1. Alexeyev, M.F. (1999). The pKNOCK series of broad-host-range mobilizable suicide vectors for gene knockout and targeted DNA insertion into the chromosome of gram-negative bacteria. *BioTechniques* 26, 824-826, 828.
2. Holdeman, L.V., Cato, E.D., and Moore, W.E.C. (1977). *Anaerobe Laboratory Manual*. (Blacksburg, Va., Virginia Polytechnic Institute and State University Anaerobe Laboratory).
3. Shipman, J.A., Cho, K.H., Siegel, H.A., and Salyers, A.A. (1999). Physiological characterization of SusG, an outer membrane protein essential for starch utilization by *Bacteroides thetaiotaomicron*. *Journal of bacteriology* 181, 7206-7211.
4. Simon, R., Priefer, U., and Puhler, A. (1983). A broad host range mobilization system for *in vivo* genetic engineering: transposon mutagenesis in Gram-negative bacteria. *Biotechnology* 1, 784-791.

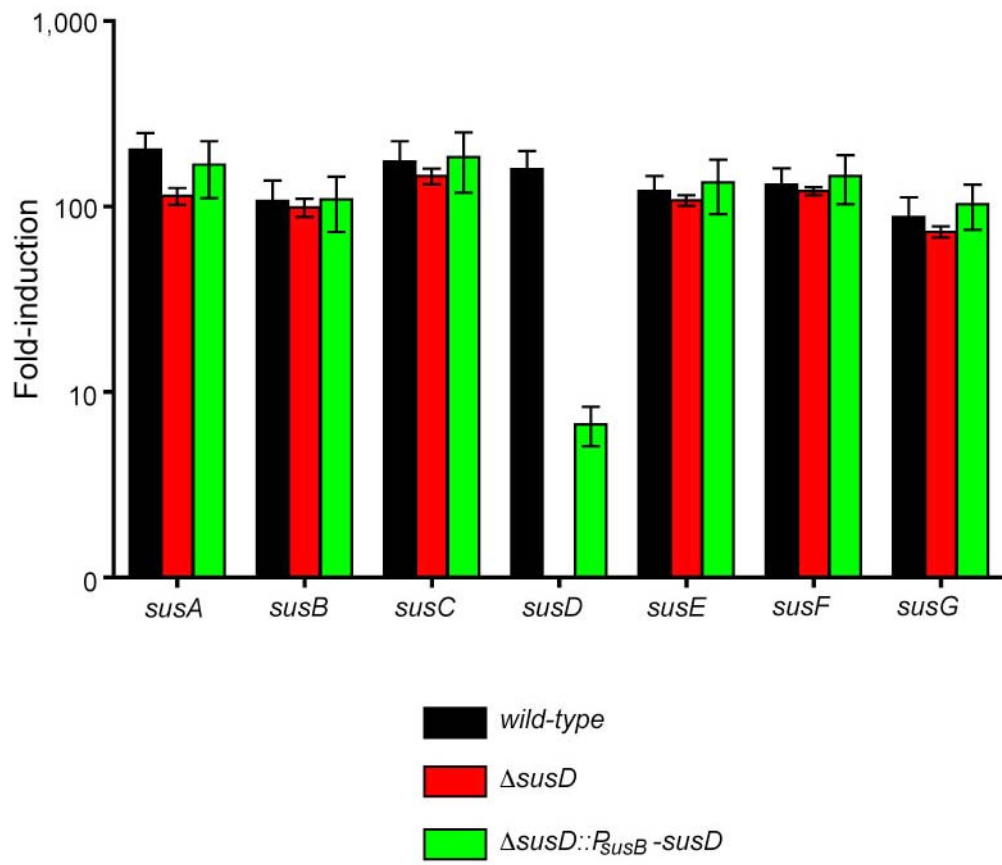

Figure S1

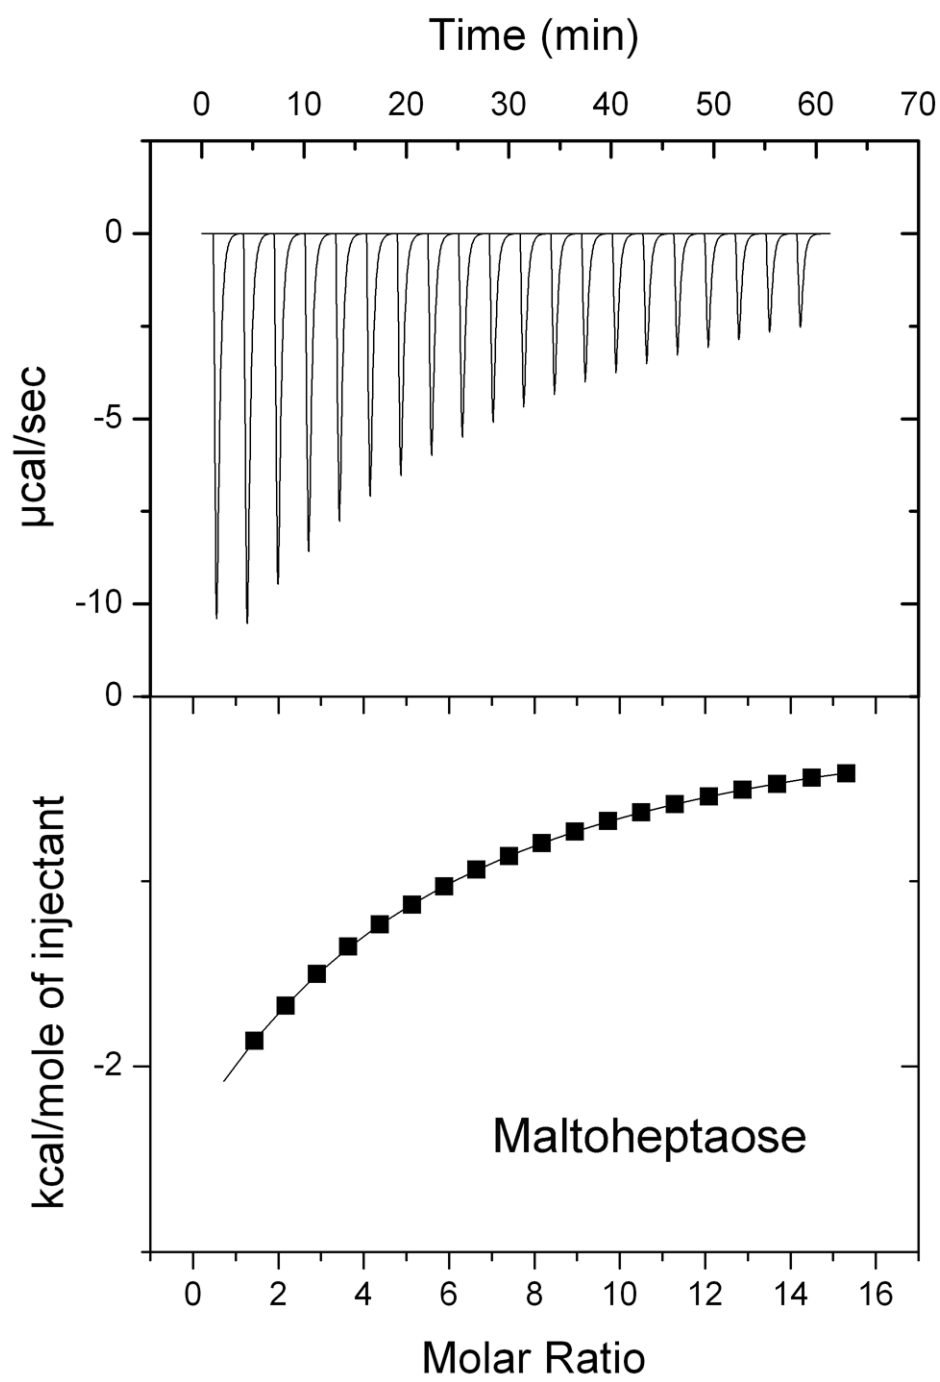

Figure S2



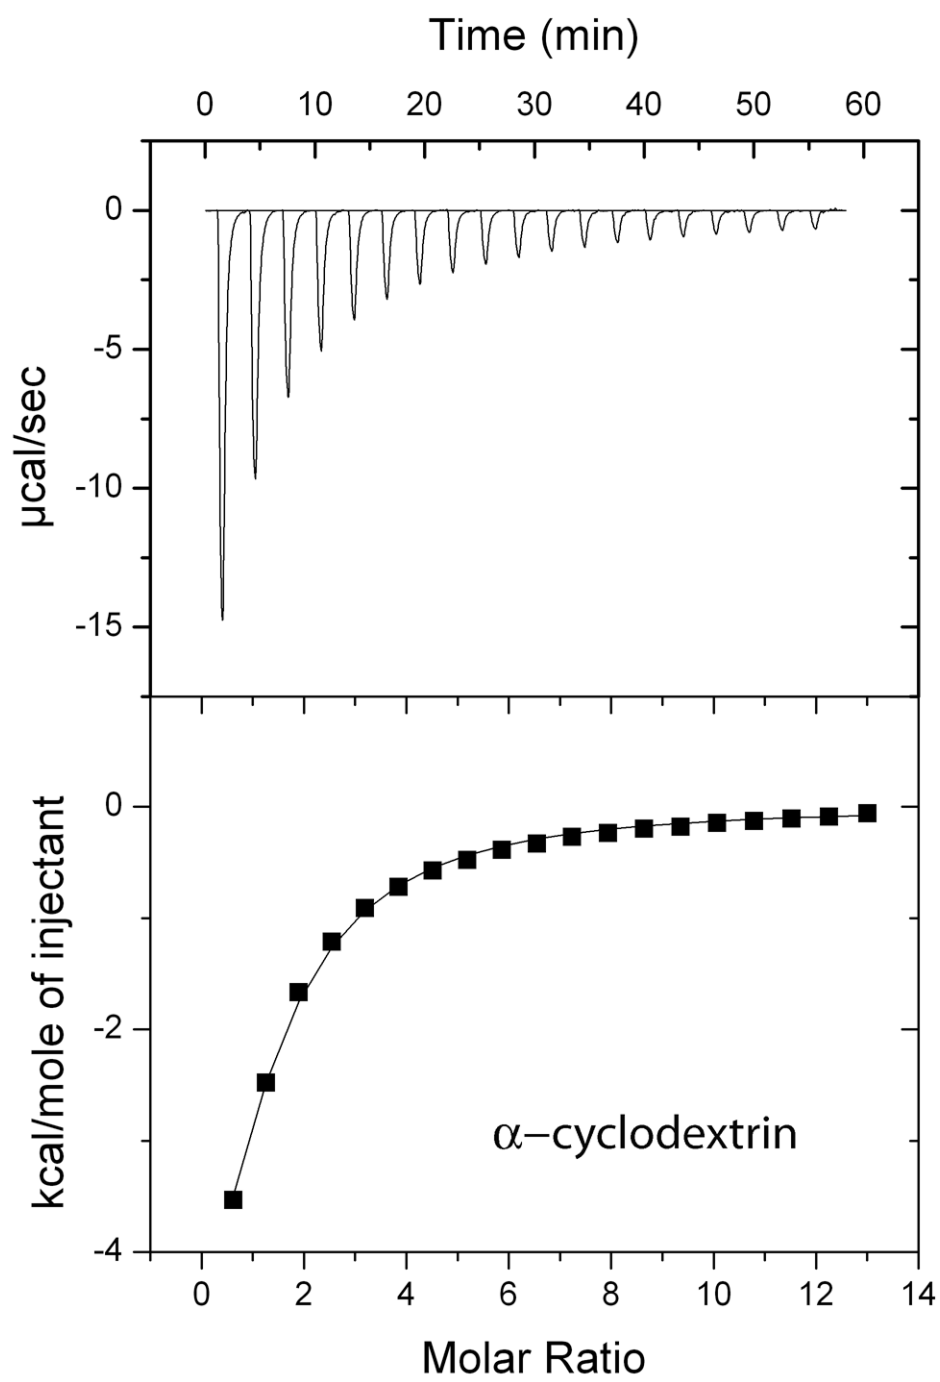

Figure S3

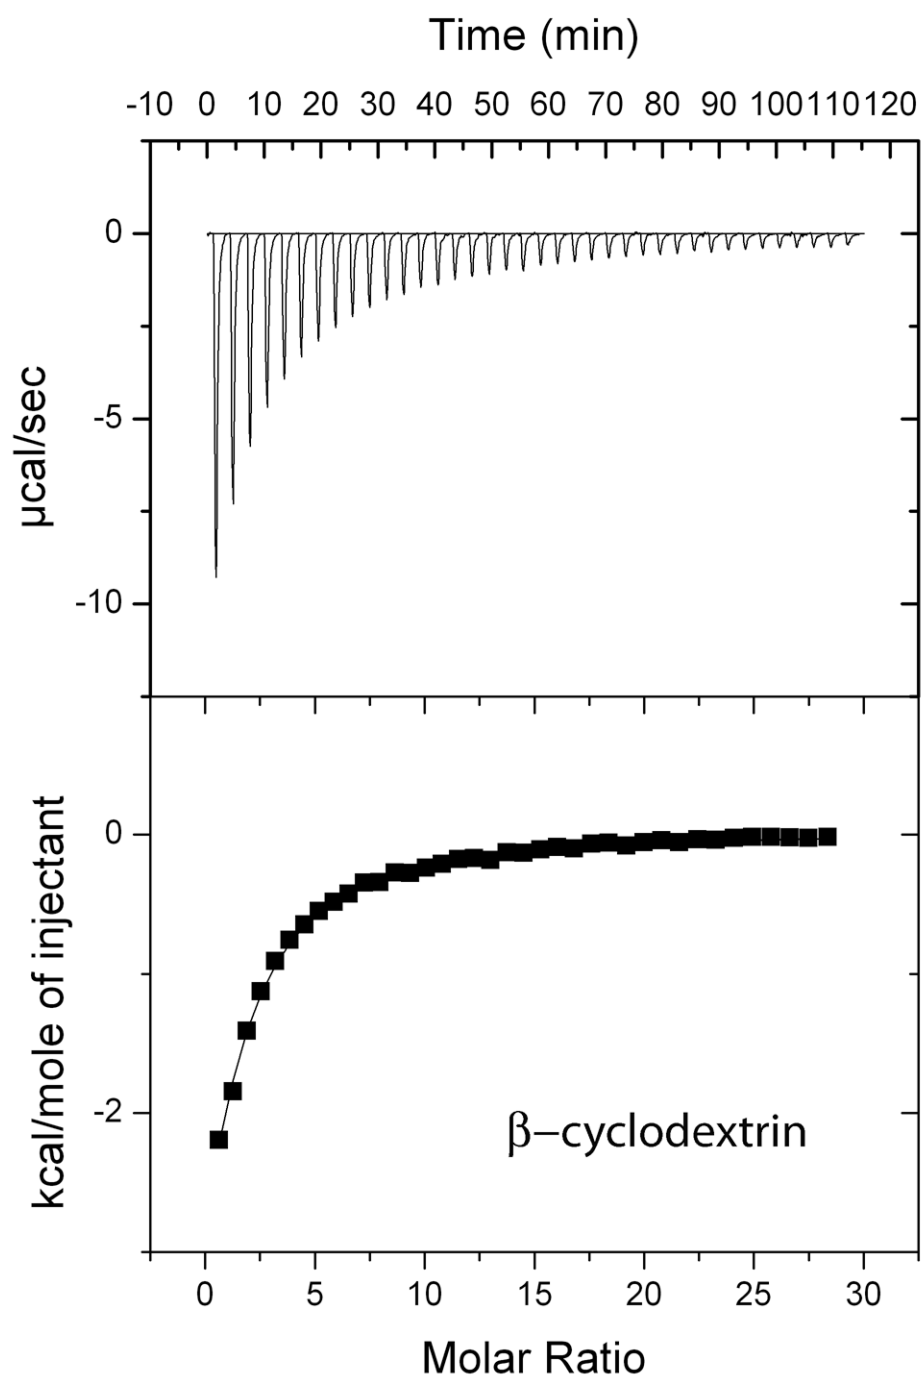

Figure S4

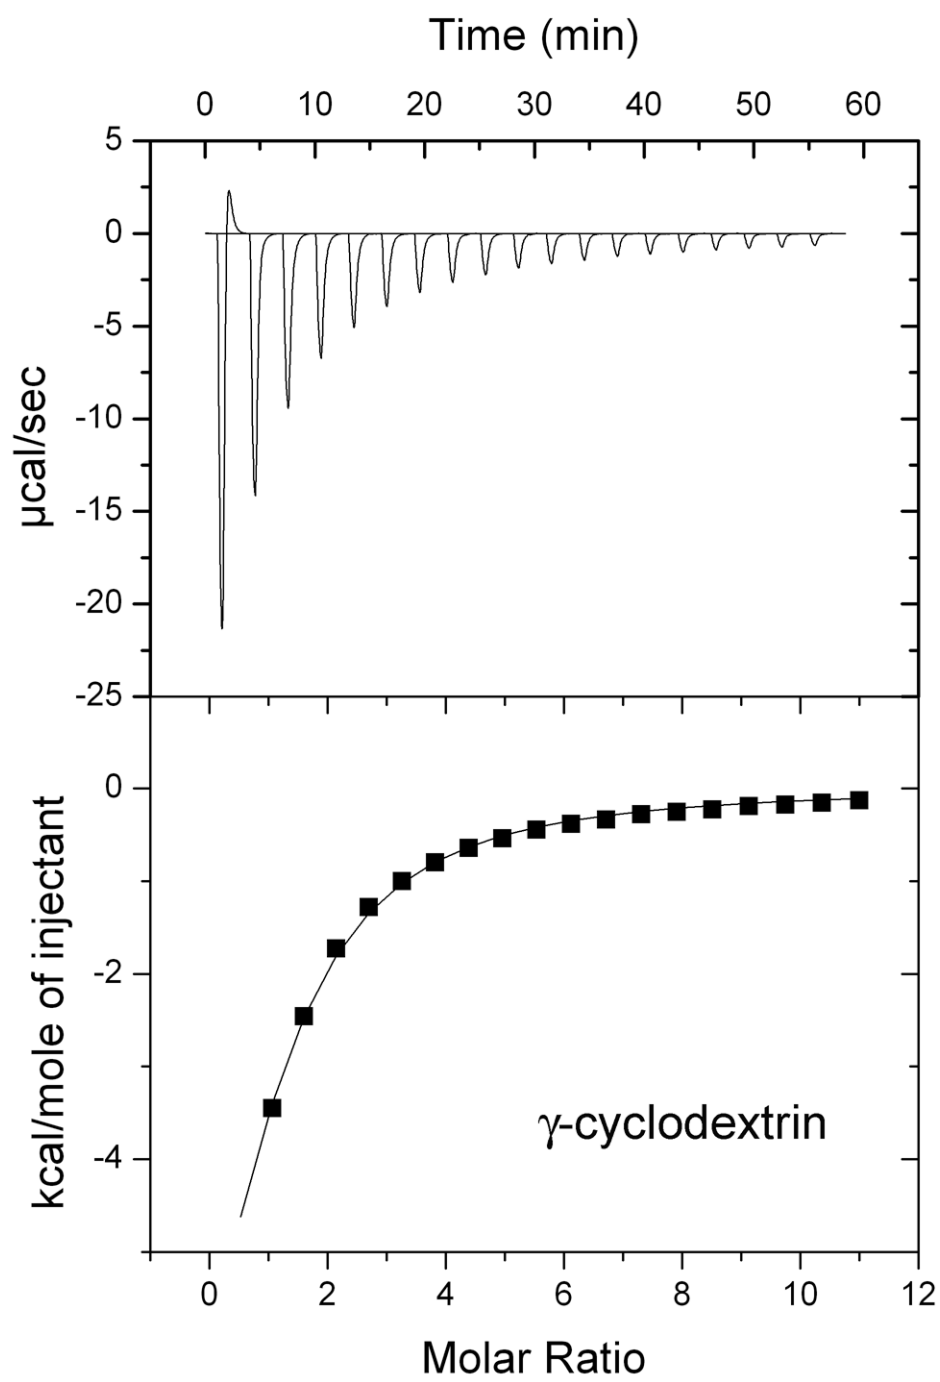

Figure S5

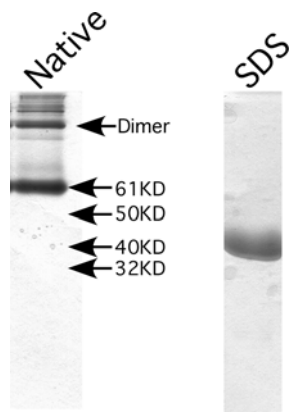

Figure S6
